# Supplementary material
Source: PubMed Central journal article supplement (PMC4804626)
Supplement: NIHMS755756-supplement-1.pdf [file NIHMS755756-supplement-1.pdf]

# Direct Hydrogel Encapsulation of Pluripotent Stem Cells Enables Ontomimetic Differentiation and Growth of Engineered Human Heart Tissues

Kerscher et. al.

## Supplementary Material

**Fig. S1.** Cluster and single encapsulated hiPSCs grew and proliferated in PEG-fibrinogen hydrogels. (A) Higher numbers of cluster hiPSCs proliferated on tissue edges, while encapsulated single hiPSCs grew independent of tissue location. (B) Initially, cells grew and occupied void spaces within the pre-existing tissue footprint, followed by a tissue growth beyond the original microisland boundaries which resulted in a lateral surface area increase of  $20.1 \pm 8.0$  % for IMR90-1 hiPSC encapsulations and  $25.5 \pm 8.0$  % for 19-9-11 hiPSC encapsulation early during differentiation (day 5,  $n = 3-4$  tissues). (C) Z-stack slice of day 10 PCNA-stained cluster encapsulated tissue edge indicated a high number of proliferating cells on the edge of the tissue. Cell nuclei were counterstained with DAPI. Star is on side of tissue edge. (D) High magnification phase contrast images of cluster encapsulated hiPSCs on day 5 and day 30 revealed differences in tissue density, leading to a dense tissue ring around the microisland perimeter. White arrows indicate locations with higher cell density.

**Fig. S2.** Contraction properties of 3D-dhECTs. (A) Frequency of spontaneous contraction increased in cluster encapsulation cardiac tissues over time, ranging from  $0.60 \pm 0.21$  Hz (Early) to  $0.92 \pm 0.16$  Hz (Intermediate) to  $1.37 \pm 0.04$  Hz (Late).  $n = 3$  independent differentiation batches. Mean  $\pm$  s.d. During long-term culture, frequency of contraction increased to  $2.2 \pm 0.1$  Hz (day 50) followed by a subsequent decrease to  $1.78 \pm 0.16$  Hz (day 60) and  $1.35 \pm 0.05$  Hz (day 90).  $n = 2$  3D-dhECTs. Mean  $\pm$  s.d. (B) Microislands formed using cluster encapsulated hiPSCs displayed higher contractility (vs. single hiPSC microislands) based on video analysis of spontaneously contracting cardiac tissues on day 14 of differentiation (see corresponding Movies S3 and S4). Y-axis represents the change in transmitted light intensity obtained from bright field microscopy as an index of contractility. Valleys correspond to the relaxed state, and peaks indicate contraction. AU (arbitrary units).

**Fig. S3.** (A) Isotype control and (B) cTnT (cardiac marker) and P4HB (fibroblast marker) stained 3D-dhECT cells resulted in  $72.5 \pm 3.2$ % CMs ( $n = 5$  tissues) and  $5.24 \pm 2.72$  % fibroblast positive cells ( $n = 3$  tissues).

**Fig. S4.** MEA recordings of 3D-dhECTs responding to exogenous pacing and beta-adrenergic agonist and antagonist drug treatment. (A) Day 20 3D-dhECTs responded to exogenous pacing up to 3 Hz (at 37°C). (B) Representative traces of 3D-dhECT spontaneous activity showing changes in field potential duration of baseline, following 1  $\mu$ M isoproterenol addition, subsequent 1  $\mu$ M propranolol addition, and after washout.

**Fig. S5.** Development of discrete sarcomere structure during ontomimetic cardiac differentiation. (A-C) 2D FFT analysis of selected  $\alpha$ SA-stained 3D-dhECTs provided evidence to an increase in sarcomere alignment and definition over time, represented by the transition from no visible rings (day 20) to visible, full rings (day 30) to more defined, aligned (direction of sarcomeres) rings (day 124). (D) Sarcomere distance of day 124 3D-dhECT CMs was quantified by generated intensity plots (increased gray scale represents existing sarcomere).

**Fig. S6.** CMs within the dense 3D-dhECTs continue to develop during extended *in vitro* culture. (A) Day 52 dissociated 3D-dhECT CMs exhibited an elongated morphology and stained positive for Caveolin 3, providing a first indication of T-tubule development. (B, C) In long-term cultured cardiac tissues, an area of increased cell density was observed on tissue edges as well as tissue outgrowth onto the acrylated glass; this tissue outgrowth contained CMs that exhibited a less mature phenotype with less defined sarcomeres and Cx43 distributed in a punctate pattern along the borders of the cells. Images are focused to visualize the bottom 2D tissue outgrowth (B) and overall tissue structure (C). Arrows indicates tissue edge. (D) Example subregion of TEM image (day 124) and plot of grayscale intensity profile for identification and counting of Z-lines (Z), neighboring I-bands (I), and H-zone (H).

**Fig. S7.** Initial cell-seeding density can be varied to produce contracting 3D-dhECTs. (A-D) Original cell-seeding density (60 million/ml) and (E-H) 50% of original cell-seeding density (30 million/ml) was compared during early stages of tissue formation. Increase in cell number (darkening effect) over time was observed for both cell-seeding densities.

## **Movies S1-S6**

Movie S1. Z-stack (8 frames, 35  $\mu\text{m}$  total thickness) of cluster encapsulated hiPSCs shows proliferating cells (PCNA positive, red) on day 10 of differentiation. Tissue was counterstained with DAPI (blue).

Movie S2. Representative video showing a spontaneously contracting 3D-dhECT microisland on day 8 of differentiation using the 19-9-11 hiPSC line.

Movie S3. Representative video showing contraction of 3D-dhECT microisland formed using cluster encapsulated hiPSCs (day 14 of cardiac differentiation).

Movie S4. Representative video showing contraction of 3D-dhECT microisland formed using single encapsulated hiPSCs (day 14 of cardiac differentiation).

Movie S5. Representative video showing contraction of a 3D-dhECT macro-tissue on day 20 of differentiation.

Movie S6. Representative video showing contraction of a 3D-dhECT microsphere on day 20 of differentiation.

## **Supplementary Table 1 References**

1. Bearzi C, Gargioli C, Baci D, Fortunato O, Shapira-Schweitzer K, Kossover O, Latronico MV, Seliktar D, Condorelli G and Rizzi R. PIGF-MMP9-engineered iPS cells supported on a PEG-fibrinogen hydrogel scaffold possess an enhanced capacity to repair damaged myocardium. *Cell Death Dis.* 2014;5:e1053.
2. Rizzi R, Di Pasquale E, Portararo P, Papait R, Cattaneo P, Latronico MV, Altomare C, Sala L, Zaza A, Hirsch E, Naldini L, Condorelli G and Bearzi C. Post-natal cardiomyocytes can generate iPS cells with an enhanced capacity toward cardiomyogenic re-differentiation. *Cell Death Differ.* 2012;19:1162-74.
3. Shapira-Schweitzer K, Habib M, Gepstein L and Seliktar D. A photopolymerizable hydrogel for 3-D culture of human embryonic stem cell-derived cardiomyocytes and rat neonatal cardiac cells. *J Mol Cell Cardiol.* 2009;46:213-24.

4. Kehat I, Kenyagin-Karsenti D, Snir M, Segev H, Amit M, Gepstein A, Livne E, Binah O, Itskovitz-Eldor J and Gepstein L. Human embryonic stem cells can differentiate into myocytes with structural and functional properties of cardiomyocytes. *J Clin Invest.* 2001;108:407-14.
5. Liu H, Collins SF and Suggs LJ. Three-dimensional culture for expansion and differentiation of mouse embryonic stem cells. *Biomaterials.* 2006;27:6004-14.
6. Liu H and Roy K. Biomimetic three-dimensional cultures significantly increase hematopoietic differentiation efficacy of embryonic stem cells. *Tissue Eng.* 2005;11:319-30.
7. Geuss LR, Allen AC, Ramamoorthy D and Suggs LJ. Maintenance of HL-1 cardiomyocyte functional activity in PEGylated fibrin gels. *Biotechnol Bioeng.* 2015;112:1446-56.
8. Claycomb WC, Lanson NA, Jr., Stallworth BS, Egeland DB, Delcarpio JB, Bahinski A and Izzo NJ, Jr. HL-1 cells: a cardiac muscle cell line that contracts and retains phenotypic characteristics of the adult cardiomyocyte. *Proc Natl Acad Sci U S A.* 1998;95:2979-84.
9. Ruan JL, Tulloch NL, Saiget M, Paige SL, Razumova MV, Regnier M, Tung KC, Keller G, Pabon L, Reinecke H and Murry CE. Mechanical Stress Promotes Maturation of Human Myocardium From Pluripotent Stem Cell-Derived Progenitors. *Stem Cells.* 2015;33:2148-57.
10. Tulloch NL, Muskheli V, Razumova MV, Korte FS, Regnier M, Hauch KD, Pabon L, Reinecke H and Murry CE. Growth of engineered human myocardium with mechanical loading and vascular coculture. *Circ Res.* 2011;109:47-59.
11. Yang L, Soonpaa MH, Adler ED, Roepke TK, Kattman SJ, Kennedy M, Henckaerts E, Bonham K, Abbott GW, Linden RM, Field LJ and Keller GM. Human cardiovascular progenitor cells develop from a KDR+ embryonic-stem-cell-derived population. *Nature.* 2008;453:524-8.
12. Kattman SJ, Witty AD, Gagliardi M, Dubois NC, Niapour M, Hotta A, Ellis J and Keller G. Stage-specific optimization of activin/nodal and BMP signaling promotes cardiac differentiation of mouse and human pluripotent stem cell lines. *Cell Stem Cell.* 2011;8:228-40.
13. Paige SL, Thomas S, Stoick-Cooper CL, Wang H, Maves L, Sandstrom R, Pabon L, Reinecke H, Pratt G, Keller G, Moon RT, Stamatoyannopoulos J and Murry CE. A temporal chromatin signature in human embryonic stem cells identifies regulators of cardiac development. *Cell.* 2012;151:221-32.
14. Ban K, Park HJ, Kim S, Andukuri A, Cho KW, Hwang JW, Cha HJ, Kim SY, Kim WS, Jun HW and Yoon YS. Cell therapy with embryonic stem cell-derived cardiomyocytes encapsulated in injectable nanomatrix gel enhances cell engraftment and promotes cardiac repair. *ACS Nano.* 2014;8:10815-25.
15. Zhao S, Agarwal P, Rao W, Huang H, Zhang R, Liu Z, Yu J, Weisleder N, Zhang W and He X. Coaxial electrospray of liquid core-hydrogel shell microcapsules for encapsulation and miniaturized 3D culture of pluripotent stem cells. *Integr Biol (Camb).* 2014;6:874-84.
16. Bauwens C, Yin T, Dang S, Peerani R and Zandstra PW. Development of a perfusion fed bioreactor for embryonic stem cell-derived cardiomyocyte generation: oxygen-mediated enhancement of cardiomyocyte output. *Biotechnol Bioeng.* 2005;90:452-61.
17. Ryan C, Nguyen BT and Sullivan SJ. Rapid assay for mycobacterial growth and antibiotic susceptibility using gel microdrop encapsulation. *J Clin Microbiol.* 1995;33:1720-6.
18. Zandstra PW, Bauwens C, Yin T, Liu Q, Schiller H, Zweigerdt R, Pasumarthi KB and Field LJ. Scalable production of embryonic stem cell-derived cardiomyocytes. *Tissue Eng.* 2003;9:767-78.
19. Lian X, Zhang J, Azarin SM, Zhu K, Hazeltine LB, Bao X, Hsiao C, Kamp TJ and Palecek SP. Directed cardiomyocyte differentiation from human pluripotent stem cells by modulating Wnt/beta-catenin signaling under fully defined conditions. *Nat Protoc.* 2013;8:162-75.
20. Lian X, Hsiao C, Wilson G, Zhu K, Hazeltine LB, Azarin SM, Raval KK, Zhang J, Kamp TJ and Palecek SP. Robust cardiomyocyte differentiation from human pluripotent stem cells via temporal modulation of canonical Wnt signaling. *Proc Natl Acad Sci U S A.* 2012;109:E1848-57.
21. Zwi-Dantsis L, Huber I, Habib M, Winterstern A, Gepstein A, Arbel G and Gepstein L. Derivation and cardiomyocyte differentiation of induced pluripotent stem cells from heart failure patients. *European heart journal.* 2013;34:1575-86.
22. Zhang D, Shadrin IY, Lam J, Xian HQ, Snodgrass HR and Bursac N. Tissue-engineered cardiac patch for advanced functional maturation of human ESC-derived cardiomyocytes. *Biomaterials.* 2013;34:5813-20.
